# Supplementary material for: Differential DNA Methylation from Autistic Children Enriches Evidence for Genes Associated with ASD and New Candidate Genes
Source: MDPI journal article supplement (doi:10.3390/brainsci13101420), 2023-10-07
Supplement: s1 [file s1]

Table S2.

| Enriched gene set      | Gene symbol    | Gene name                                      |
|------------------------|----------------|------------------------------------------------|
| <b>Aortic disease</b>  | <i>AEBP1</i>   | AE binding protein 1                           |
|                        | <i>COL12A1</i> | collagen type XII alpha 1 chain                |
|                        | <i>COL5A1</i>  | collagen type V alpha 1 chain                  |
|                        | <i>CRIP2</i>   | cysteine rich protein 2                        |
|                        | <i>CTSZ</i>    | cathepsin Z                                    |
|                        | <i>FBN1</i>    | fibrillin 1                                    |
|                        | <i>FOXE3</i>   | forkhead box E3                                |
|                        | <i>SPON1</i>   | spondin 1                                      |
|                        |                |                                                |
| <b>Premature birth</b> | <i>COL5A1</i>  | collagen type V alpha 1 chain                  |
|                        | <i>COL5A2</i>  | collagen type V alpha 2 chain                  |
|                        | <i>CYP26C1</i> | cytochrome P450 family 26 subfamily C member 1 |
|                        | <i>EPHX1</i>   | epoxide hydrolase 1                            |
|                        | <i>GSTM1</i>   | glutathione S-transferase mu 1                 |
|                        | <i>GSTP1</i>   | glutathione S-transferase pi 1                 |
|                        | <i>IGF1</i>    | insulin like growth factor 1                   |

Table S2.

|                                 |                |                                                      |
|---------------------------------|----------------|------------------------------------------------------|
|                                 | <i>IL10RA</i>  | interleukin 10 receptor subunit alpha                |
|                                 | <i>KCNJ1</i>   | potassium voltage-gated channel subfamily J member 1 |
|                                 | <i>NDP</i>     | NDP, norrin cystine knot growth factor               |
|                                 | <i>PTGER2</i>  | prostaglandin E receptor 2                           |
|                                 | <i>PTGER3</i>  | prostaglandin E receptor 3                           |
|                                 | <i>SFTPA1</i>  | surfactant protein A1                                |
|                                 | <i>TFAP2B</i>  | transcription factor AP-2 beta                       |
|                                 | <i>TRAPPC2</i> | trafficking protein particle complex 2               |
|                                 | <i>TSHR</i>    | thyroid stimulating hormone receptor                 |
|                                 |                |                                                      |
| <b>Musculoskeletal diseases</b> | <i>AMPD1</i>   | adenosine monophosphate deaminase 1                  |
|                                 | <i>ANKRD11</i> | ankyrin repeat domain 11                             |
|                                 | <i>ANTXR2</i>  | ANTXR cell adhesion molecule 2                       |
|                                 | <i>BGLAP</i>   | bone gamma-carboxyglutamate protein                  |
|                                 | <i>COL5A1</i>  | collagen type V alpha 1 chain                        |
|                                 | <i>DLX5</i>    | distal-less homeobox 5                               |
|                                 | <i>DMD</i>     | dystrophin                                           |

Table S2.

|                 |                                                        |
|-----------------|--------------------------------------------------------|
| <i>DNAJB6</i>   | DnaJ heat shock protein family (Hsp40) member B6       |
| <i>EXT1</i>     | exostosin glycosyltransferase 1                        |
| <i>EZR</i>      | ezrin                                                  |
| <i>FBN1</i>     | fibrillin 1                                            |
| <i>FGFR2</i>    | fibroblast growth factor receptor 2                    |
| <i>FKRP</i>     | fukutin related protein                                |
| <i>FRAS1</i>    | Fraser extracellular matrix complex subunit 1          |
| <i>HLA-DQA1</i> | major histocompatibility complex, class II, DQ alpha 1 |
| <i>IGF1</i>     | insulin like growth factor 1                           |
| <i>IL17A</i>    | interleukin 17A                                        |
| <i>KAT6B</i>    | lysine acetyltransferase 6B                            |
| <i>MBNL2</i>    | muscleblind like splicing regulator 2                  |
| <i>MTM1</i>     | myotubularin 1                                         |
| <i>NELL1</i>    | neural EGFL like 1                                     |
| <i>PADI4</i>    | peptidyl arginine deiminase 4                          |
| <i>PAX8</i>     | paired box 8                                           |
| <i>RYR1</i>     | ryanodine receptor 1                                   |

Table S2.

|  |                 |                                                                                                |
|--|-----------------|------------------------------------------------------------------------------------------------|
|  | <i>SMARCAL1</i> | SWI/SNF related, matrix associated, actin dependent regulator of chromatin, subfamily a like 1 |
|  | <i>TBX1</i>     | T-box 1                                                                                        |
|  | <i>TNXB</i>     | tenascin XB                                                                                    |
|  | <i>TRAPPC2</i>  | trafficking protein particle complex 2                                                         |
|  | <i>TRIM21</i>   | tripartite motif containing 21                                                                 |
|  | <i>TSHR</i>     | thyroid stimulating hormone receptor                                                           |
