# Supplementary material for: Differential DNA Methylation from Autistic Children Enriches Evidence for Genes Associated with ASD and New Candidate Genes
Source: MDPI journal article supplement (doi:10.3390/brainsci13101420), 2023-10-07
Supplement: s1 [file s1]

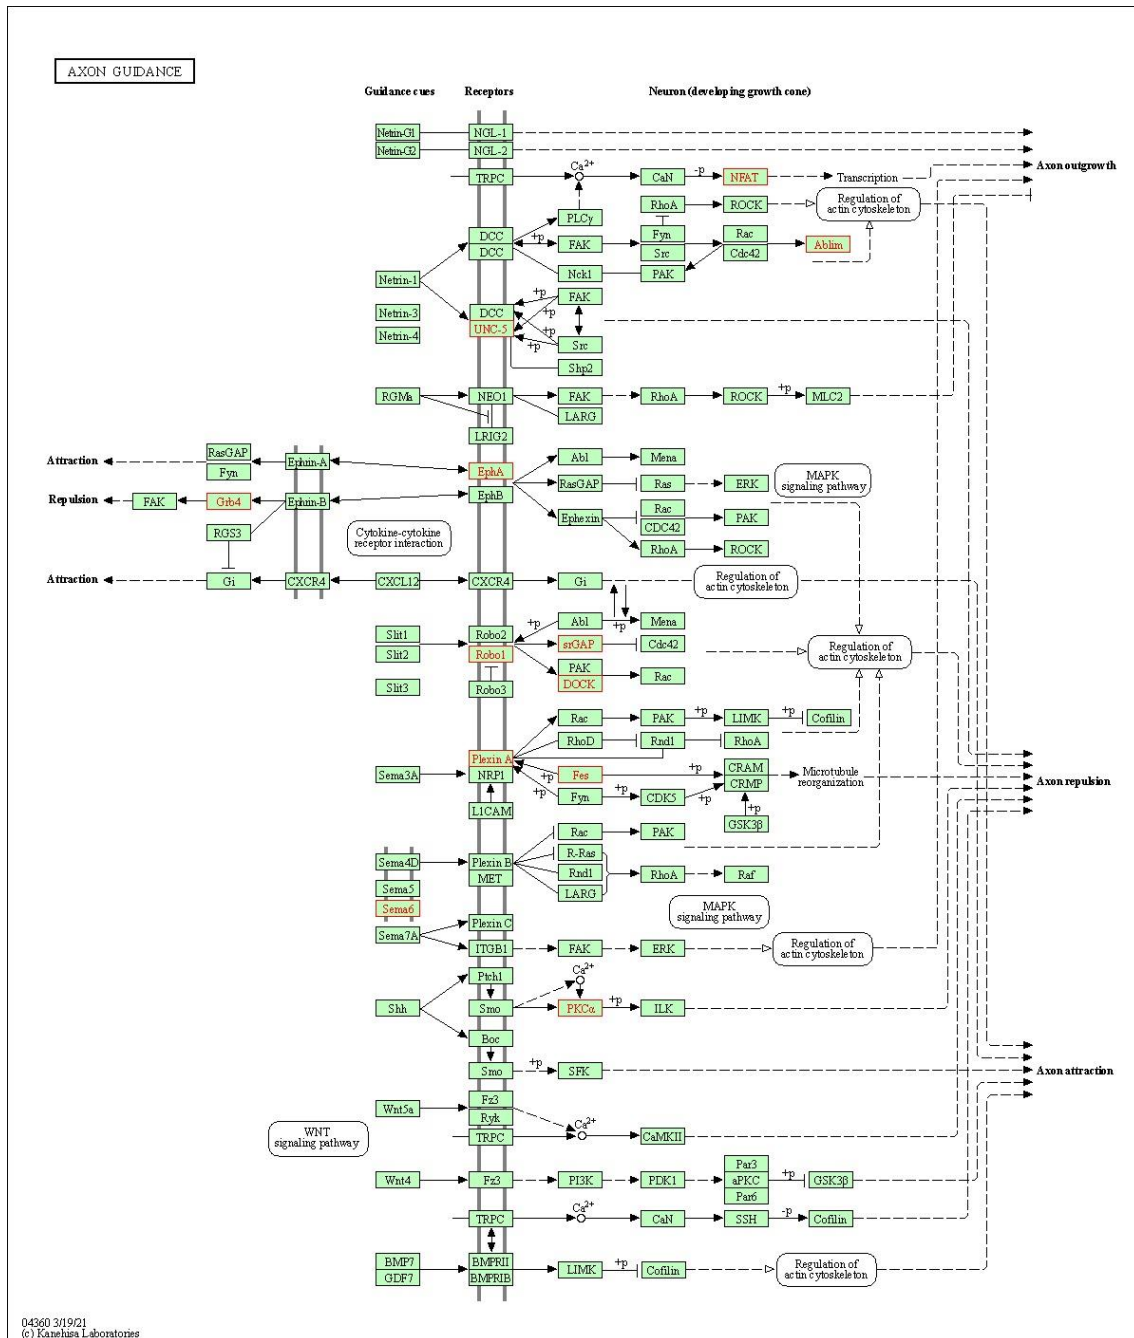

Supplementary Figure S1. Axon guidance pathway from KEGG data base. The genes harboring DMCs are shows in red.
